# Supplementary material
Source: PubMed Central journal article supplement (PMC6326875)
Supplement: NIHMS1505772-supplement-1.pdf [file NIHMS1505772-supplement-1.pdf]

# Figure S1, related to Figure 1

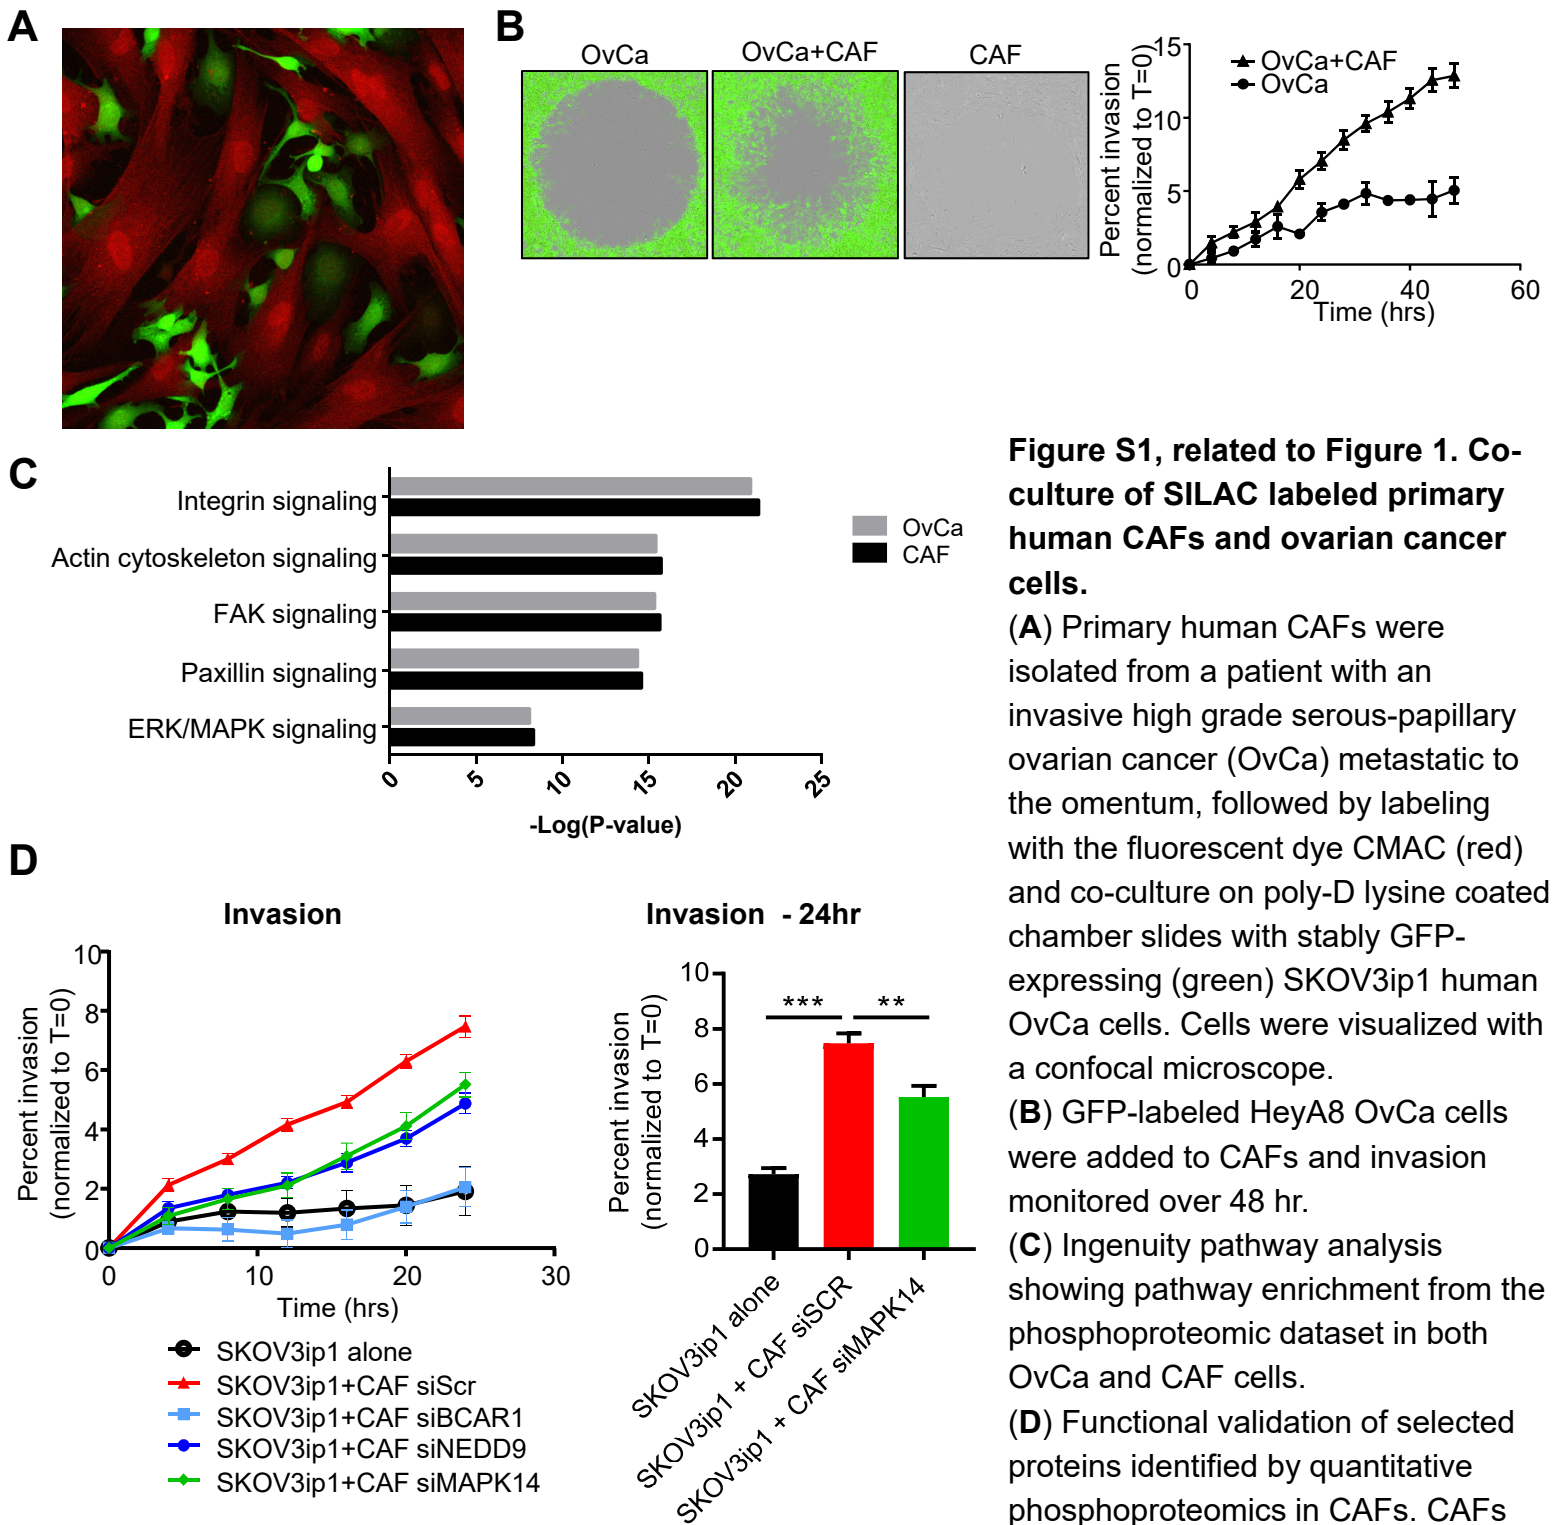

**Figure S1, related to Figure 1. Co-culture of SILAC labeled primary human CAFs and ovarian cancer cells.**

(A) Primary human CAFs were isolated from a patient with an invasive high grade serous-papillary ovarian cancer (OvCa) metastatic to the omentum, followed by labeling with the fluorescent dye CMAC (red) and co-culture on poly-D lysine coated chamber slides with stably GFP-expressing (green) SKOV3ip1 human OvCa cells. Cells were visualized with a confocal microscope.

(B) GFP-labeled HeyA8 OvCa cells were added to CAFs and invasion monitored over 48 hr.

(C) Ingenuity pathway analysis showing pathway enrichment from the phosphoproteomic dataset in both OvCa and CAF cells.

(D) Functional validation of selected proteins identified by quantitative phosphoproteomics in CAFs. CAFs were transfected with siRNAs for BCAR1, NEDD9 MAPK14 (p38a) or a scrambled control (siScr), and then plated with GFP labeled SKOV3ip1 cells. *Left*, invasion of the GFP-labeled cancer cells was measured over time with or without CAFs. *Right*, percent invasion of the GFP-labeled cancer cells is shown at T=24 hr. Six technical replicates were used per condition. \*\*p< 0.01, \*\*\*p< 0.001.



**Figure S2, related to Figure 2. PGM1 activity is modulated by phosphorylation of Y353.**

**(A)** Schematic of glycogen synthesis and degradation.

**(B)** Crystal structure of rabbit muscle PGM1 created using PyMOL. PDB ID: 3PMG. Y353 is shown on the outside of the structure in magenta. The active site is indicated.

**(C)** Alignment of the PGM1 sequence from several species indicates that the PGM1 Y353 phospho-site is evolutionary conserved in eukaryotes suggesting its importance. PGM1 protein sequences from different species were aligned using the Clustal Omega program. Y353 is highlighted in yellow. Uniprot ID is shown for each sequence. MOUSE, HUMAN, YEAST, RABIT (rabbit), BOVIN (cow), MACFA (cynomolgus monkey), DICDI (slime mold: Dictyostelium discoideum), ARATH (plant: Arabidopsis thaliana - Mouse-ear cress). The numbers in the column on the right are amino acid numbers of the protein sequence.

**(D)** A lentiviral construct containing the PGM1 cDNA was transfected in HEK293T cells and the supernatant used to infect SKOV3ip1 to express V5-tagged PGM1. PGM1 protein was immunoprecipitated using a V5 antibody and detected using the newly raised PGM1 Y353 phospho-antibody.

**(E)** Western blot showing the specificity of the phospho-Y353 PGM1 antibody. SKOV3ip1 cells were infected with lentivirus expressing either the WT (Y353) or the phenylalanine mutant (Y353F) and lysates were blotted with phospho-Y353 PGM1 antibody.

**(F)** PGM1 activity assay. PGM1 enzyme was immunoprecipitated using a V5 antibody from SKOV3ip1 cells stably expressing the V5-tagged WT or Y353F mutant constructs and analyzed for PGM1 activity using glucose-1-phosphate as the substrate ( $***p < 0.001$ ). Background (BKGD). 6-phosphogluconate (6PG).

**(G)** CETSA assay on TYK-nu (*left*) and SKOV3ip1 (*right*) cells expressing either wild-type (WT) or the Y353F mutant PGM1. Data shown is an average of 4 biological replicates.

**(H)** Protein expression of glycogen phosphorylase isoforms PYGL and PYGB in three ovarian cancer cell lines. Data was extracted from a previously published proteomic dataset (Coscia et al., 2016).

**(I)** Western blot of p-PGM1 and total glycogen phosphorylase (PYGL) in TYK-nu cells following co-culture with CAFs over a time-course. Images are representative of 3 biological replicates.

**(J)** Glycogen content in primary human CAFs with or without co-culture with TYK-nu cells in a transwell insert. Values are mean + SEM from 4 biological replicates.

Figure S3, related to Figure 2

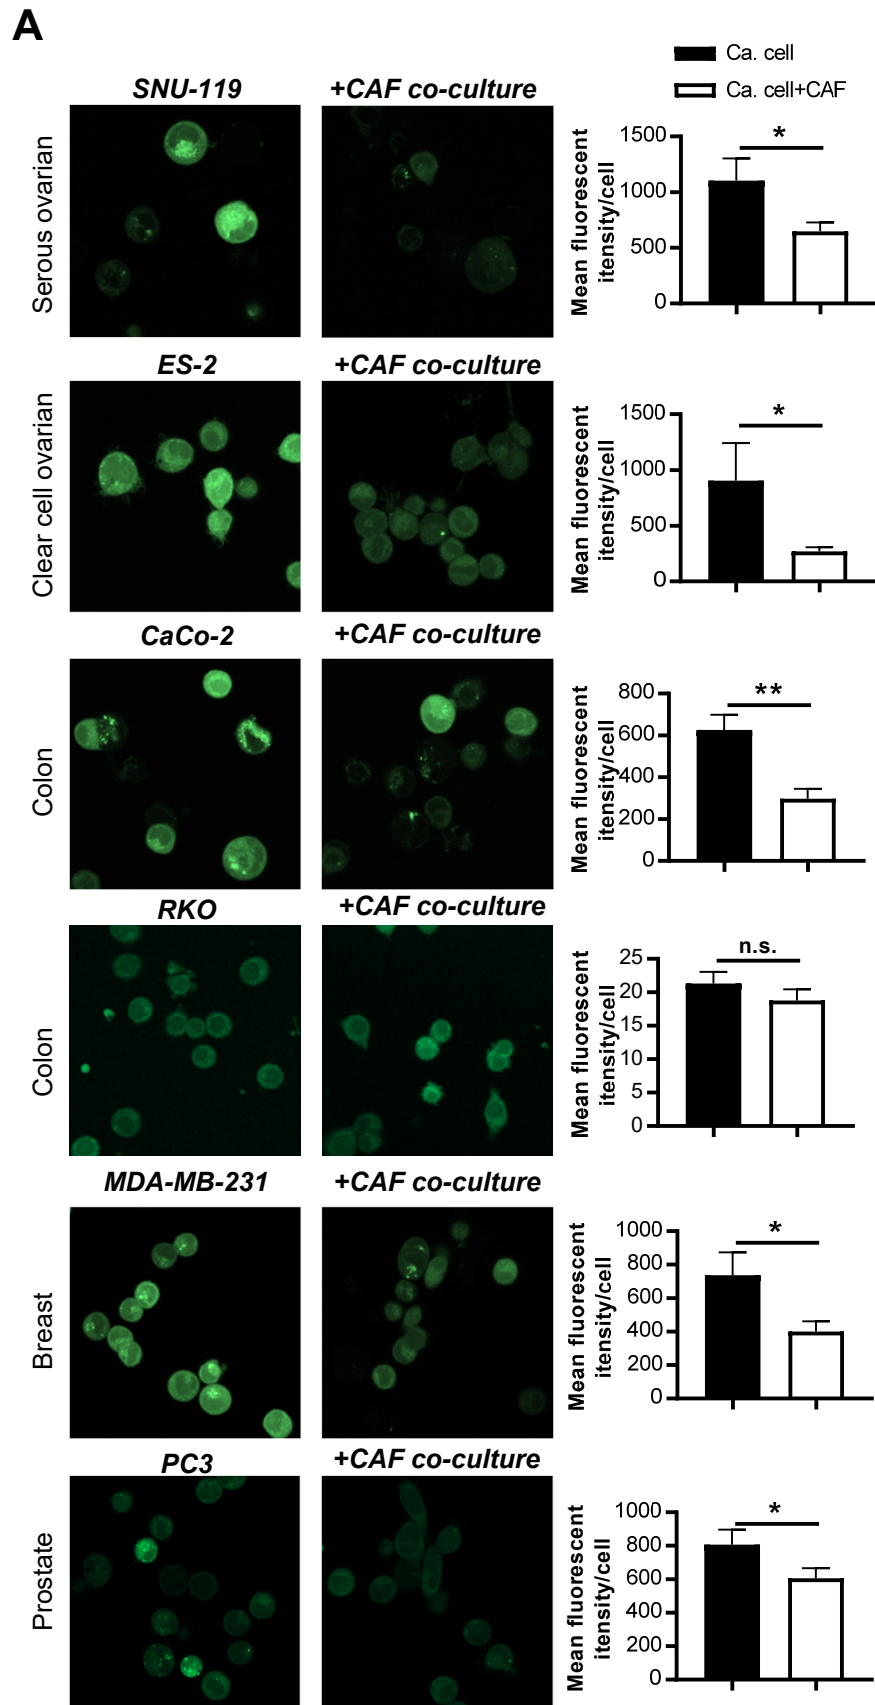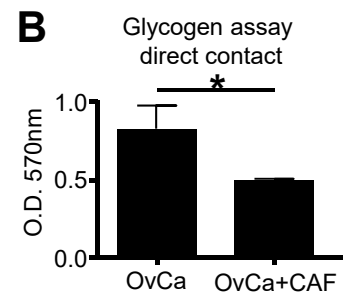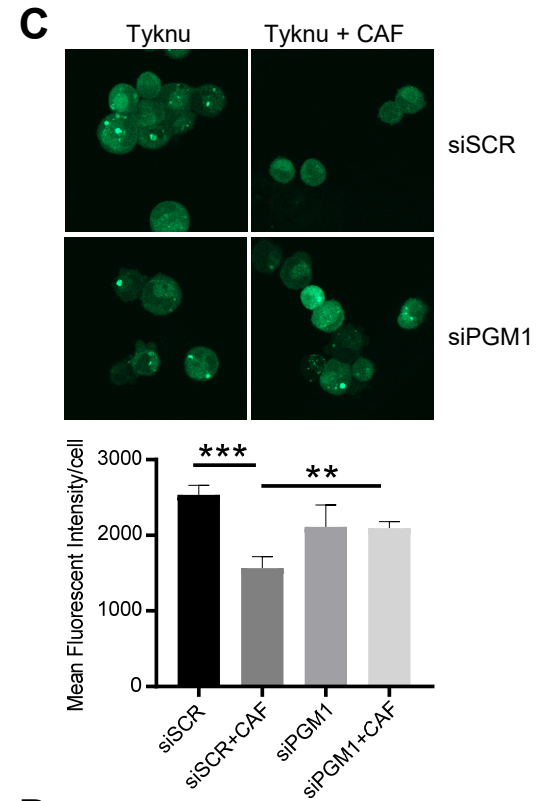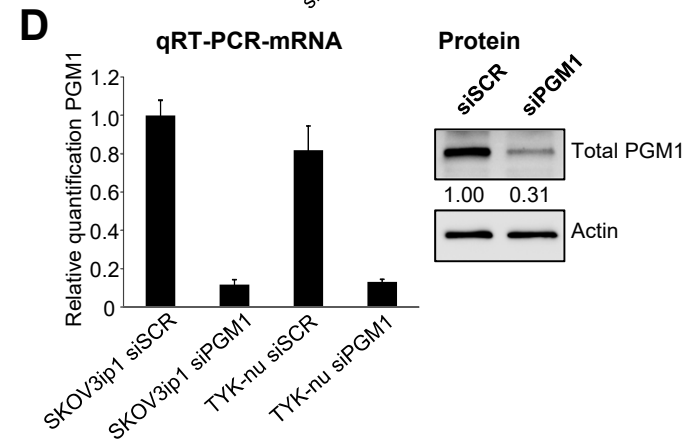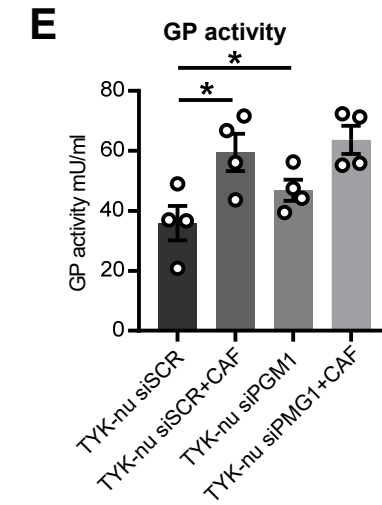

**Figure S3, related to Figure 2. CAFs induce glycogen hydrolysis in multiple cancer cell types**

**(A)** Several cancer cell lines store glycogen and use glycogen upon co-culture with CAFs. Glycogen content was visualized by 2-NBDG fluorescence and detected by confocal microscopy. Positive glycogen stain is seen as granular, green stain in the cytoplasm. Quantification is shown on the right.

**(B)** Glycogen content was quantified by measuring the hydrolysis of glycogen to glucose in FACS sorted SKOV3ip1-GFP cells with or without CAF co-culture for 4 hr. \*p-value < 0.05.

**(C)** Glycogen levels were detected using 2-NBDG fluorescence after siRNA-mediated knocked down of PGM1 (siPGM1) in TYK-nu OvCa. Positive glycogen stain is seen as granular, green stain in the cytoplasm. Quantification is shown below.

**(D)** *Left*, qRT-PCR for PGM1 transcript levels following transfection with PGM1 siRNA (siPGM1) or scrambled control (siSCR) in both, TYK-nu and SKOV3ip1 OvCa cells. *Right*, western blot for total PGM1 in TYK-nu cells following siRNA transfection with indicated siRNAs. The image is representative of three biological replicates.

**(E)** Glycogen phosphorylase activity in TYK-nu cells transfected with PGM1 siRNA or scrambled siRNA and co-cultured with primary human CAFs separated by a transwell cell culture insert. Values are mean + SEM from 4 independent experiments (n=3/group/experiment) \*p<0.05.

Figure S4, related to Figure 3

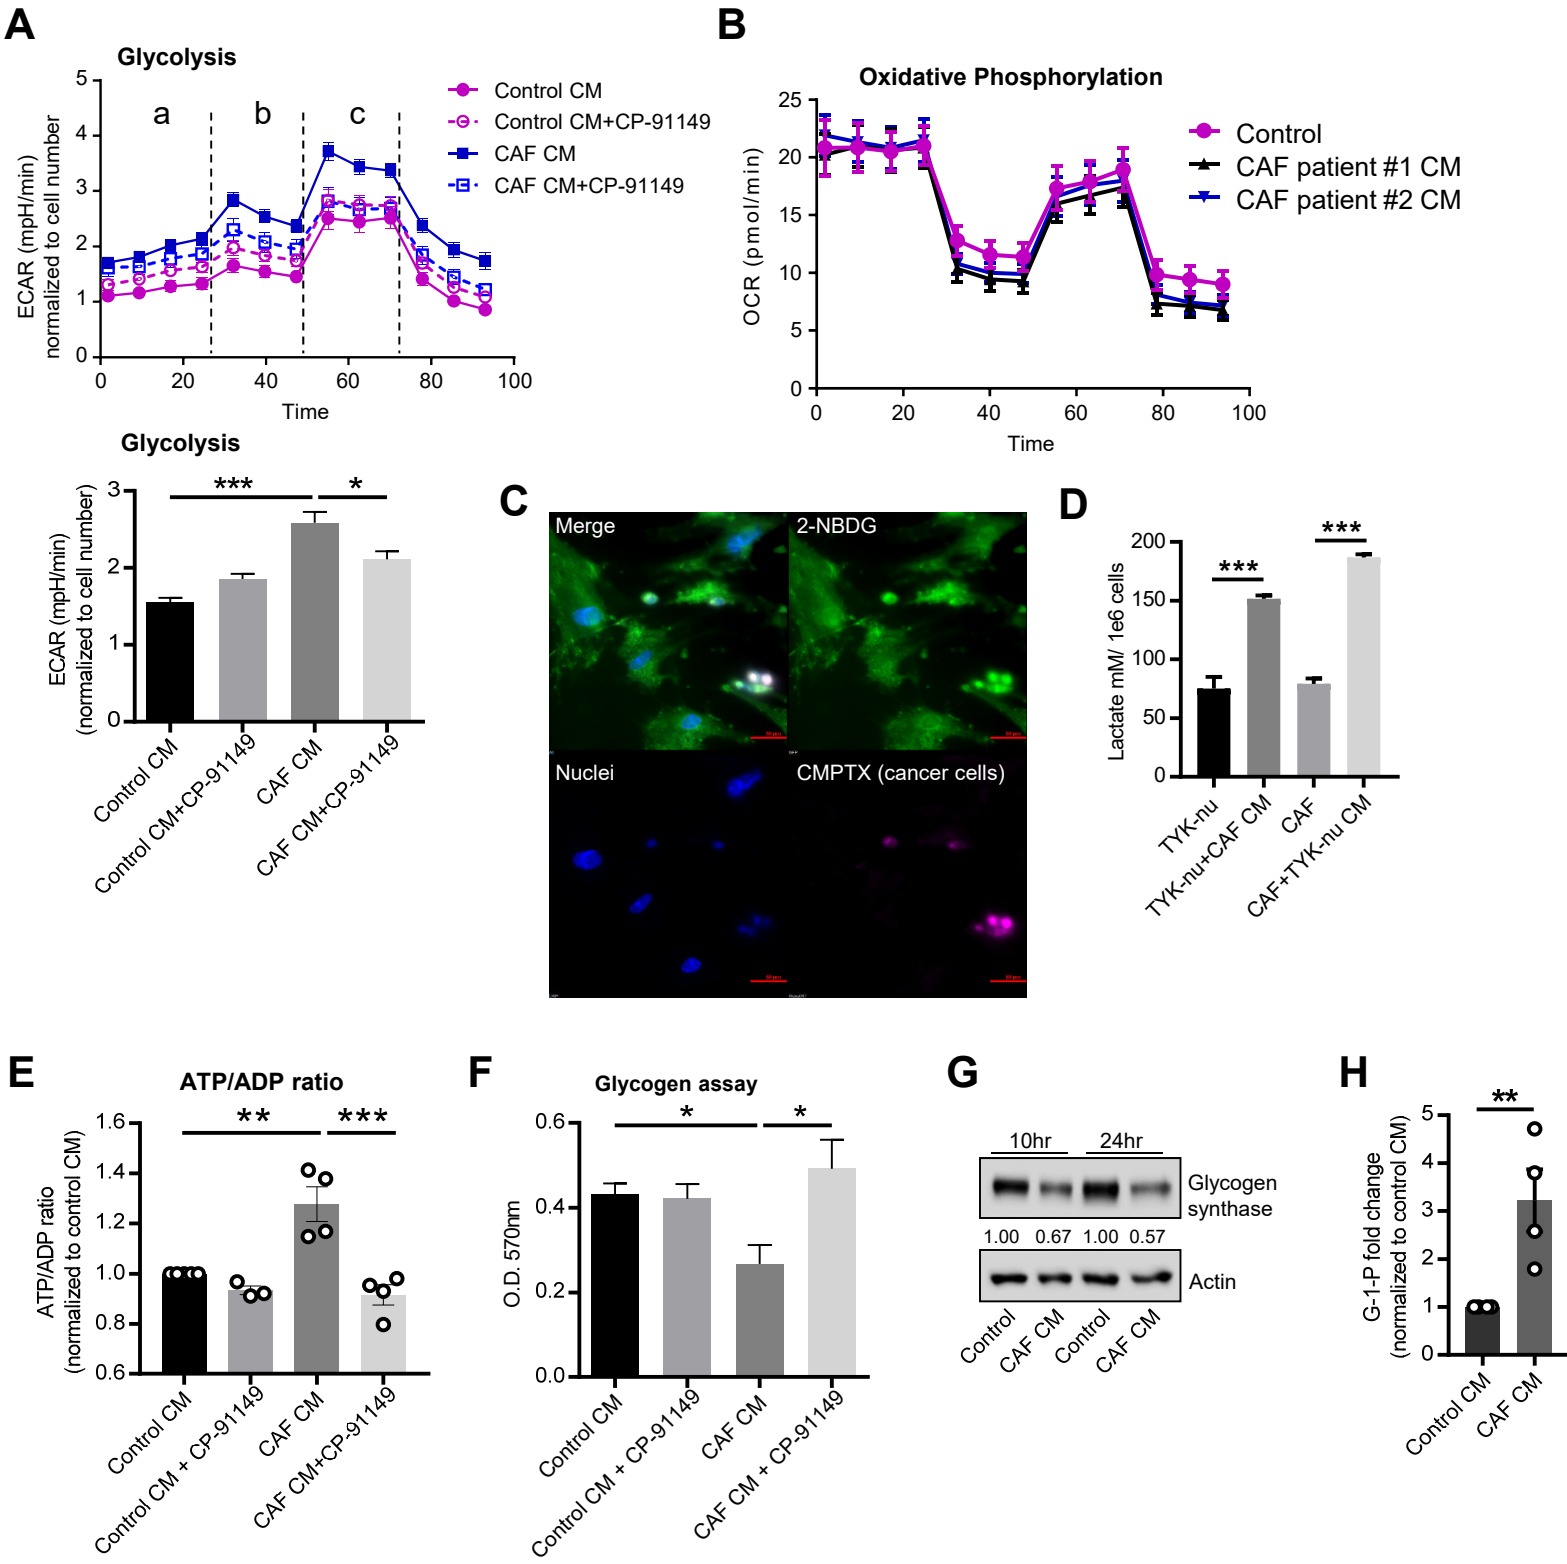

**Figure S4, related to Figure 3. CAF-induced glycolysis is dependent on glycogen phosphorylase activity.**

**(A)** Glycolysis. SKOV3ip1 cells were pretreated with the glycogen phosphorylase inhibitor CP-91149 for 4 hr followed by treatment with conditioned media (CM) from primary human CAFs or control CM for 16 hr. Glycolysis was measured using the Seahorse SF96 Extracellular Flux Analyzer. Extracellular acidification rates (ECAR) are shown normalized to cell number. 'a', basal glycolysis; 'b', glycolysis; 'c', glycolytic capacity. Lower panel shows the average of the 3 glycolysis time points for each group, \* $p < 0.05$ , \*\*\* $p < 0.001$ .

**(B)** Oxygen consumption rate (OCR)/oxidative phosphorylation in cancer cells. SKOV3ip1 cells were treated with CM from 2 different primary CAFs or control conditioned media (CM) for 24 hr then OCR was measured (Seahorse XF96 Analyzer).

**(C)** Glucose uptake was assessed by uptake of the fluorescent glucose analog 2-NBDG (green). TYK-nu cells labeled with CMPTX were co-cultured with primary human CAFs overnight and then incubated with 2-NBDG for 30min prior to imaging. Scale bar = 50 $\mu$ M. Images are representative of two independent experiments.

**(D)** Lactate concentration in media from TYK-nu cells cultured alone or treated with CAF CM or CAF cultured alone or CAF cultured with TYK-nu CM for 24 hours. Concentrations of lactate in the CM were subtracted from these values. The concentration was normalized to cell number. Data is representative of two biological replicates

**(E)** ATP/ADP ratios in SKOV3ip1 cells treated with CAF or control CM pretreated with or without CP-91149, an inhibitor of glycogen phosphorylase. Values are mean + SEM from 4 independent experiments ( $n=4$ /group) and are normalized to the control. Comparisons were made to CAF CM using a Paired two tailed  $t$  test, \*\*  $p < 0.01$ , \*\*\* $p < 0.001$ .

**(F)** Glycogen assay on SKOV3ip1 cancer cells pretreated with the glycogen phosphorylase inhibitor CP-91149, followed by stimulation with control or CAF CM.

**(G)** Western blot analysis of total glycogen synthase in TYK-nu cells treated with control or CAF CM. Relative band intensity is shown normalized to actin.

**(H)** Glucose-1-phosphate quantification in TYK-nu cells 4 hours after stimulation with control or CAF conditioned media (CM). Data is from 4 biological replicates with CM from human primary CAFs from 4 patients normalized to control CM. \*\*,  $p$ -value  $< 0.01$ .

# Figure S5, related to Figures 3 and 6

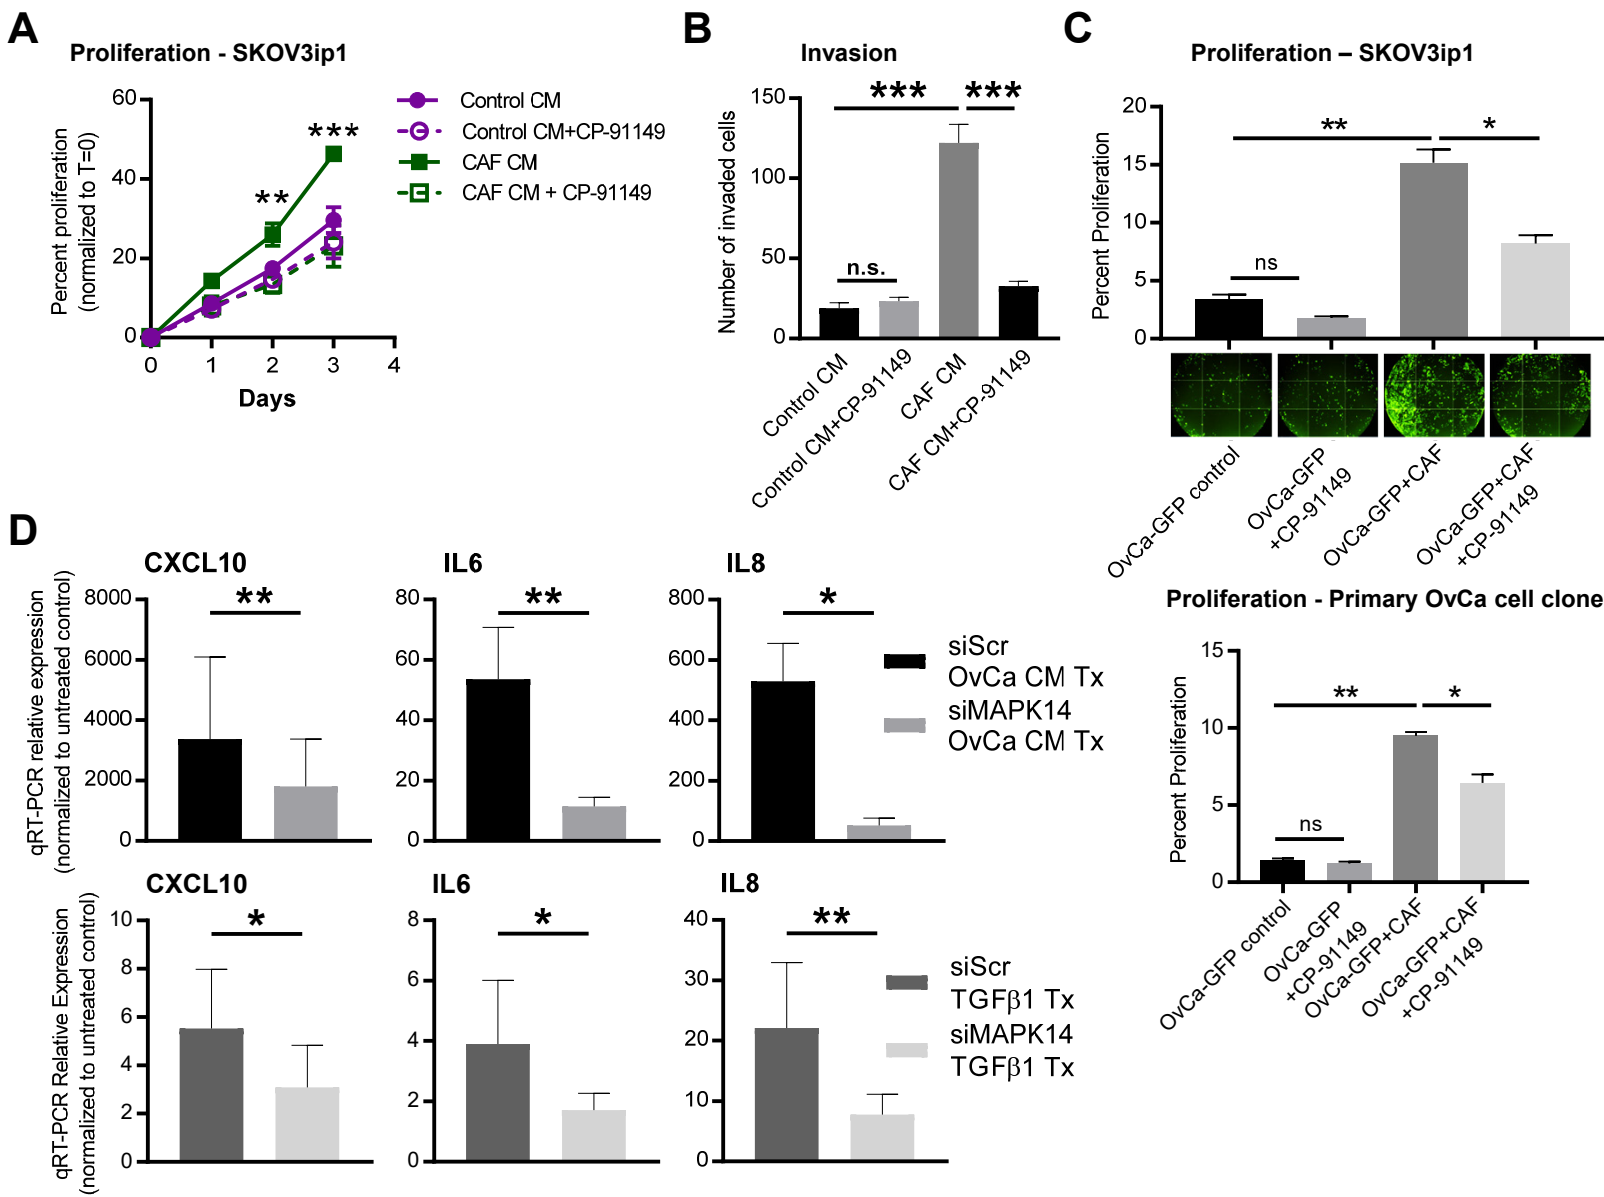

## Figure S5, related to Figures 3 and 6. CAF-induced glycogen mobilization induces cancer cell proliferation and invasion.

(A) Proliferation of SKOV3ip1 cells exposed to CAF CM with or without the glycogen phosphorylase inhibitor CP-91149. Values are mean + SEM from 4 independent experiments (n=6/group). Comparisons were made to CAF CM using a Two-way ANOVA (\*\* p<0.01, \*\*\*p<0.001).

(B) Boyden chamber invasion of SKOV3ip1 cells exposed to CAF CM or control with or without CP-91149. Data is representative of 3 independent experiments. Values are mean + SEM (n=3/group), \*\*\*p<0.001.

(C) Proliferation of SKOV3ip1-GFP cells (*upper*) and primary OvCa cell clone (*lower*) in direct contact with CAFs with or without CP-91149 after 48 hr. Data is representative of 3 independent experiments. Values are mean + SEM (n=6/group), \*\*\*p<0.001.

(D) Validation of cytokine expression by qRT-PCR in CAFs. The primary CAFs were transfected with a siRNA targeting p38α (siMAPK14) or a scrambled siRNA (siScr) and either stimulated with TYK-nu (OvCa) CM or TGF-β1. RNA was extracted and cytokine expression detected using the indicated TaqMan probes. Values are mean + SEM from 4 independent experiments with primary CAFs quantified relative to untreated control cells. Comparisons were made using a Paired one-tailed *t* test (\*p<0.05, \*\* p<0.01, \*\*\*p<0.001).



Figure S6, related to Figure 7

**A**

**HGSOC omental metastasis**

Patient# 1

Patient# 2

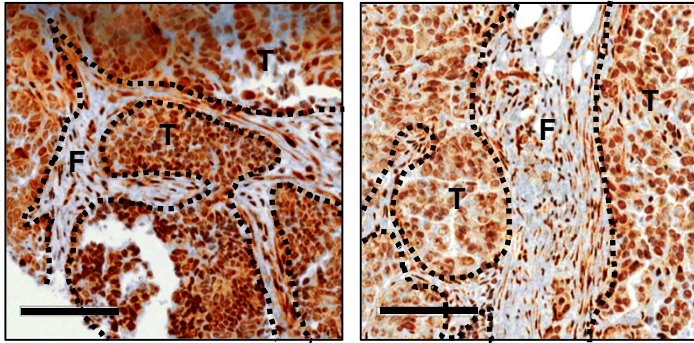

**Normal omentum**

Patient# 1

Patient# 2

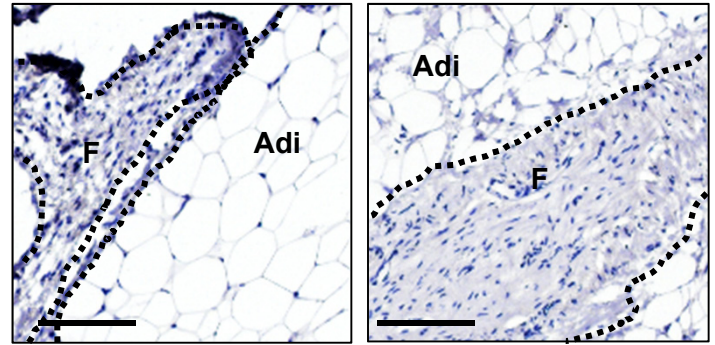

**p-p38 IHC scoring**

|                                          | HGSOC omental metastasis | Normal omentum |
|------------------------------------------|--------------------------|----------------|
| Positive cases                           | 50/50                    | 0/10           |
| Average cells percent positive/case (SD) | 86.5 (16.5)              |                |
| Average score 0-3 (SD)                   | 1.8 (0.56)               |                |

**B**

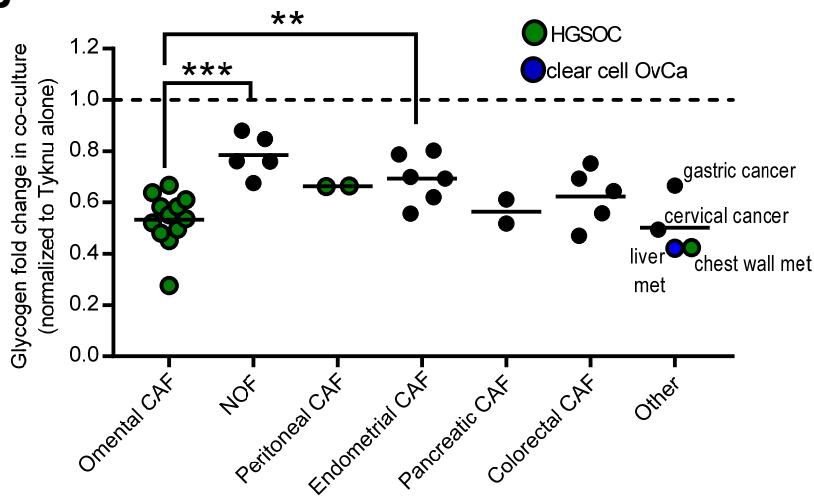

**C**

**H&E staining**

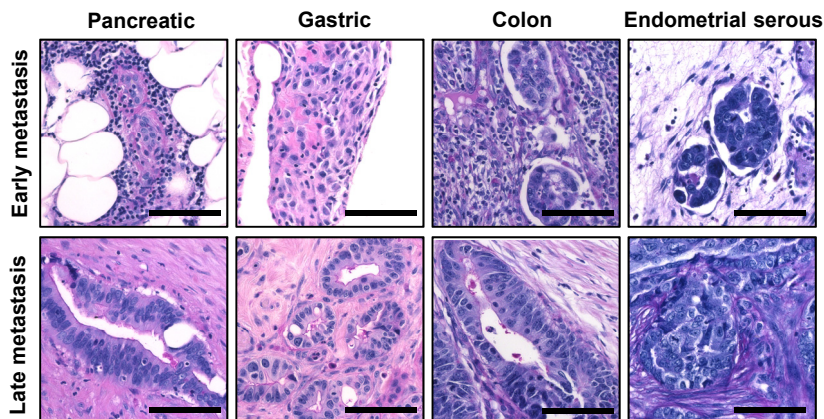

**Figure S6, related to Figure 7. p-p38 $\alpha$  in human metastasis and glycogen content in human cancer.**

**(A)** Representative images of p-p38 $\alpha$  MAPK immunostaining in the stroma of patients with invasive OvCa and omentum from normal patients 'F' indicates areas of fibroblasts, 'T' indicates areas of tumor cells, 'Adi' indicated adipocytes. Scale bar is equal to 100 $\mu$ m (left). Analysis of immunohistochemical phospho-p38 $\alpha$  staining in 50 HGSOC omental tumors (right). Digital scoring was done on fibroblasts in the stroma using Aperio software and results were confirmed by a gynecologic pathologist. Ten normal omentums from human patients were also reviewed by a pathologist for p-38 $\alpha$  staining in fibroblasts. SD – standard deviation.

**(B)** Glycogen assay on TYK-nu cells co-cultured with primary CAFs isolated from the indicated tumor types originating from their primary sites within the abdominal cavity. Subtypes of ovarian tumors are indicated by color. Data is normalized to TYK-nu alone set at 1 and is indicated by the dashed line. Each dot represents primary CAFs isolated from an individual patient. Normal omental fibroblasts (NOF) extracted from patients without cancer were used as control. Comparisons with omental CAFs were made using an unpaired, two-way, Mann Whitney test, \*\*p < 0.01, \*\*\*p < 0.001. HGSOC, high grade serous ovarian cancer.

**(C)** Representative histology (H&E stain) of early and late omental metastases of pancreatic, gastric, colon, and endometrial serous cancers demonstrating the distribution of the fibroblast rich stroma in the cases used in Figure 7B. Scale bar = 100 $\mu$ m.

Table S3, related to Figure 1

**a**

**OvCa pY Results**

| Gene name | phosphosite   | log2 fold increase | Q-value |
|-----------|---------------|--------------------|---------|
| PXN       | S85Y88*       | 4.03               | 0.007   |
| LDHA      | Y10           | 3.69               | 0.0114  |
| MAPK1     | Y187*         | 3.66               | 0.0057  |
| PXN       | Y88*          | 3.32               | 0.009   |
| ANXA2     | Y318*         | 3.06               | 0.0193  |
| LPP       | Y317*         | 2.21               | 0.0067  |
| BCAR1     | Y234*         | 2.19               | 0.0796  |
| MYH9      | Y754*         | 2.11               | 0.085   |
| PTK2      | Y598Y599*     | 2.00               | 0.0193  |
| PPP1R12A  | Y911*         | 1.99               | 0.0612  |
| DYRK1A    | Y273*         | 1.88               | 0.0121  |
| PGM1      | Y353          | 1.87               | 0.0543  |
| ANXA2     | Y317*         | 1.82               | 0.0445  |
| EEF1A1    | Y29*          | 1.81               | 0.0405  |
| PEAK1     | Y387          | 1.78               | 0.0207  |
| PXN       | Y118*         | 1.71               | 0.0021  |
| PTK2      | T597Y599*     | 1.52               | 0.0067  |
| ARHGAP12  | T231S240Y243* | 1.51               | 0.0976  |
| ARHGAP12  | T230S240Y243* | 1.51               | 0.0976  |
| ARHGAP42  | Y376          | 1.50               | 0.0651  |
| TLN1      | Y26*          | 1.44               | 0.0268  |
| TLN2      | Y1665*        | 1.36               | 0.007   |
| PARD3     | Y388*         | 1.23               | 0.0067  |
| ERBB2IP   | Y1104*        | 1.12               | 0.088   |
| GSK3B     | Y216S219*     | 1.10               | 0.0068  |
| BCAR1     | Y128*         | 1.04               | 0.0687  |
| CDK1      | T14Y15*       | 1.04               | 0.009   |

| Gene name | phosphosite | log2 fold increase | Q-value |
|-----------|-------------|--------------------|---------|
| KIAA1598  | Y24         | -3.18              | 0.0182  |
| PAG1      | Y359*       | -2.47              | 0.0023  |
| TUBB2C    | Y51         | -2.32              | 0.0021  |
| DCBLD2    | Y732        | -2.06              | 0.0021  |
| DSP       | Y56*        | -1.89              | 0.0194  |
| CFL1      | Y89*        | -1.69              | 0.0021  |
| ATP1A1    | Y260*       | -1.69              | 0.005   |
| APP       | Y762*       | -1.64              | 0.0044  |
| PAG1      | Y417*       | -1.43              | 0.0021  |
| VIM       | Y276        | -1.43              | 0.0093  |
| SEPT7     | Y319*       | -1.40              | 0.0145  |
| APP       | Y757Y762*   | -1.40              | 0.0232  |
| RAB34     | Y247        | -1.36              | 0.0126  |
| KRT8      | Y267*       | -1.36              | 0.0329  |
| CLDN3     | Y198        | -1.36              | 0.0568  |
| SLC7A11   | Y15         | -1.29              | 0.0048  |
| EIF3L     | Y36         | -1.29              | 0.0145  |
| TGM2      | Y369*       | -1.25              | 0.0232  |
| APP       | Y757*       | -1.18              | 0.0505  |
| KIRREL    | Y461*       | -1.15              | 0.0023  |
| KIRREL    | Y458*       | -1.15              | 0.0023  |
| EZR       | Y354*       | -1.15              | 0.0177  |
| CAV1      | Y25         | -1.12              | 0.0021  |
| CTNND1    | Y803        | -1.09              | 0.0067  |
| PPP1R12A  | Y766        | -1.09              | 0.0121  |
| LDHA      | Y239*       | -1.09              | 0.0755  |
| PKP4      | Y306        | -1.06              | 0.0048  |
| HNRNPA0   | Y180*       | -1.06              | 0.0117  |
| HIPK2     | Y352*       | -1.06              | 0.0121  |
| KIRREL    | Y560*       | -1.03              | 0.0021  |
| S100A11   | Y30*        | -1.03              | 0.0145  |
| SLC25A4   | Y191        | -1.03              | 0.0932  |

**b**

**CAF pY Results**

| Gene name | phosphosite | log2 fold increase | Q-value |
|-----------|-------------|--------------------|---------|
| EPHA2     | Y588Y594*   | 4.15               | 0.021   |
| EPHA2     | Y960        | 3.05               | 0.021   |
| BCAR1     | Y128*       | 2.69               | 0.0466  |
| EPHA2     | Y594*       | 2.57               | 0.0444  |
| DYRK1A    | Y273*       | 2.34               | 0.0444  |
| ARHGAP42  | Y376        | 2.28               | 0.0263  |
| ARHGAP42  | Y792        | 2.27               | 0.021   |
| PXN       | S85Y88*     | 1.66               | 0.0475  |
| NEDD9     | Y345*       | 1.51               | 0.021   |
| AHNAK     | Y160        | 1.51               | 0.0878  |
| PPP1R12A  | Y911*       | 1.49               | 0.0643  |
| MAPK14    | Y182*       | 1.45               | 0.0444  |
| KIRREL    | Y557*       | 1.33               | 0.0704  |
| TLN1      | Y70*        | 1.24               | 0.0444  |

| Gene name | phosphosite | log2 fold increase | Q-value |
|-----------|-------------|--------------------|---------|
| PLD3      | Y7          | -2.32              | 0.0067  |
| ITGB4     | Y1207*      | -1.69              | 0.0153  |
| TSG101    | Y390        | -1.40              | 0.0153  |
| PSMA2     | Y57*        | -1.36              | 0.0678  |
| ALB       | Y164*       | -1.25              | 0.0446  |
| PKP4      | Y420*       | -1.00              | 0.0217  |

**Table S3. Significant changes in phosphopeptides detected by quantitative phosphoproteomics**  
**a**, Significantly altered phosphopeptides in OvCa cells after co-culture with CAFs.  
**b**, Significantly altered phosphopeptides in CAFs after co-culture with OvCa cells. The Q-value is an estimate of the false discovery rate (FDR) based on the calculated p-values corrected for multiple hypothesis testing. Red indicates increased phosphosite while, green indicates decreased phosphosite. Asterisks indicate a known Human Protein Reference Database (HPRD) phosphorylation site.
